# Supplementary material
Source: Springer Nature journal article supplement (https://www.springermedizin.de/resource/supplementary/12974_2011_432_MOESM1_ESM.pdf/9601280)

**Control**

**HSV-1**

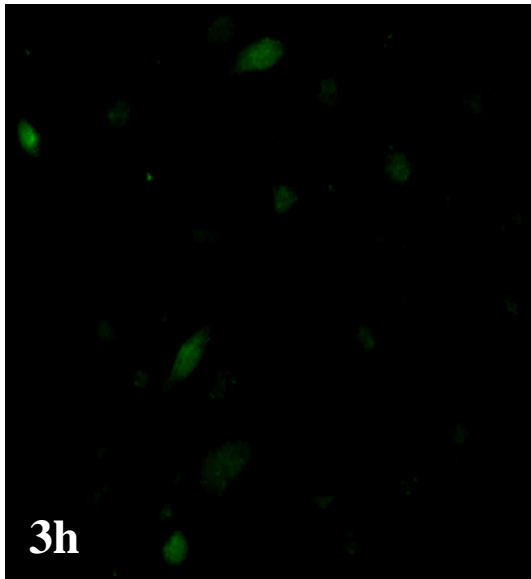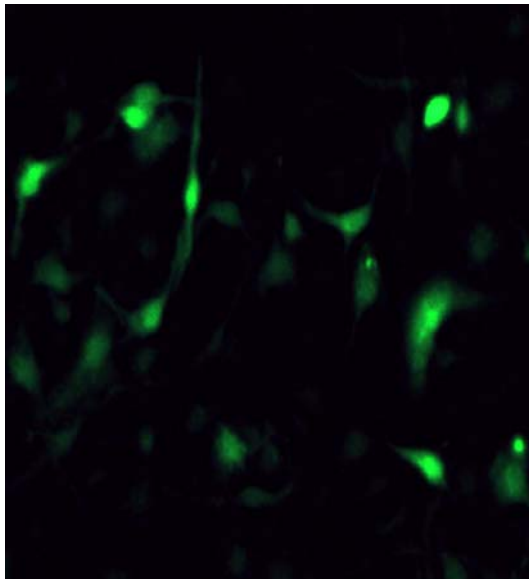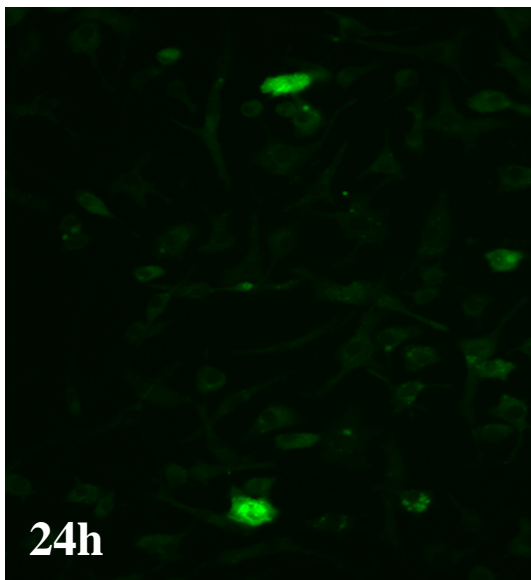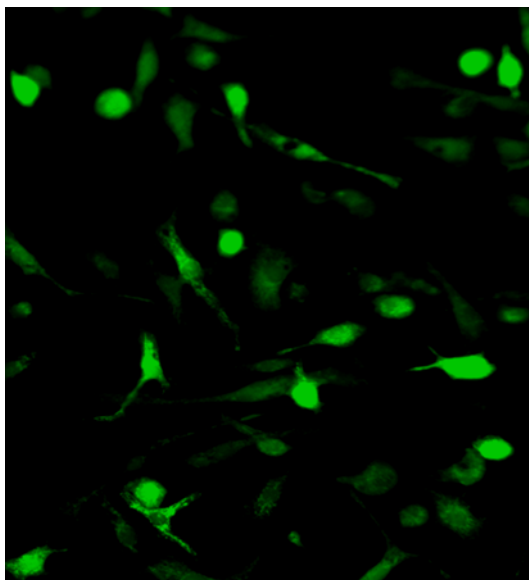

Supplement: MOESM1 [file 9601280]
